# Supplementary material for: Structural analysis of heavy oil fractions after hydrodenitrogenation by high-resolution tandem mass spectrometry and ion mobility spectrometry
Source: Royal Society of Chemistry journal article supplement (doi:10.1039/c8fd00239h), 2019-01-01
Supplement: c8fd00239h1.pdf [file c8fd00239h1.pdf]

1 **Structural analysis of heavy oil fractions after**  
2 **hydrodenitrogenation by high-resolution tandem mass**  
3 **spectrometry and ion mobility spectrometry.**

4

5 Johann Le Maître<sup>1,2,3</sup>, Marie Hubert-Roux<sup>1,3</sup>, Benoit Paupy<sup>2,3</sup>, Sabrina Marceau<sup>2,3</sup>, Christopher Rüger<sup>1</sup>, Carlos  
6 Afonso<sup>1,3</sup>, Pierre Giusti<sup>2,3</sup>

7

8 <sup>1</sup>, Normandie Université, COBRA, UMR 6014 et FR 3038; Université de Rouen;

9 INSA de Rouen; CNRS, IRCOF, Mont Saint Aignan Cedex, France

10 <sup>2</sup>TOTAL Refining & Chemicals, Total Research & Technology Gonfreville, BP 27, 76700 Harfleur, France.

11 <sup>3</sup>CNRS Joint Laboratory C2MC, Complex Matrices Molecular Characterization - CNRS (France) BP 27, 76700  
12 Harfleur, France

13

14

### Supporting Information

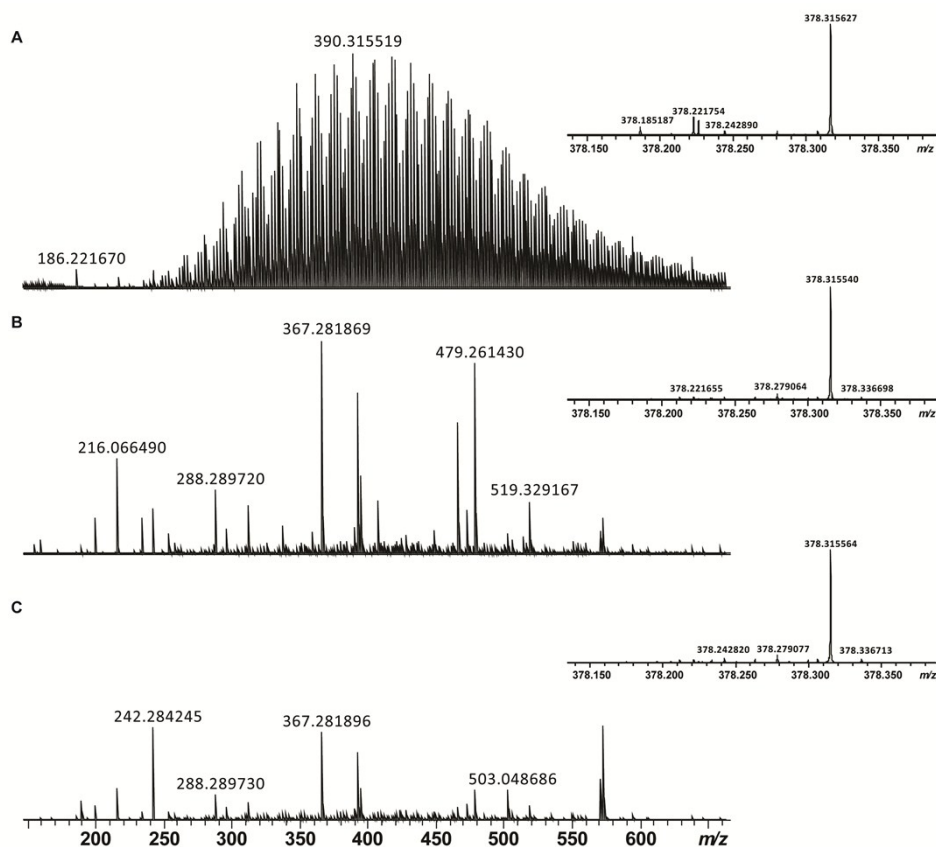

15

16 **Figure S1. ESI(+)-mass spectra of the feed VGO (A), Effluent 70 ppm (B) and Effluent 10 ppm (C) recorded by**  
17 **FTICRMS.**

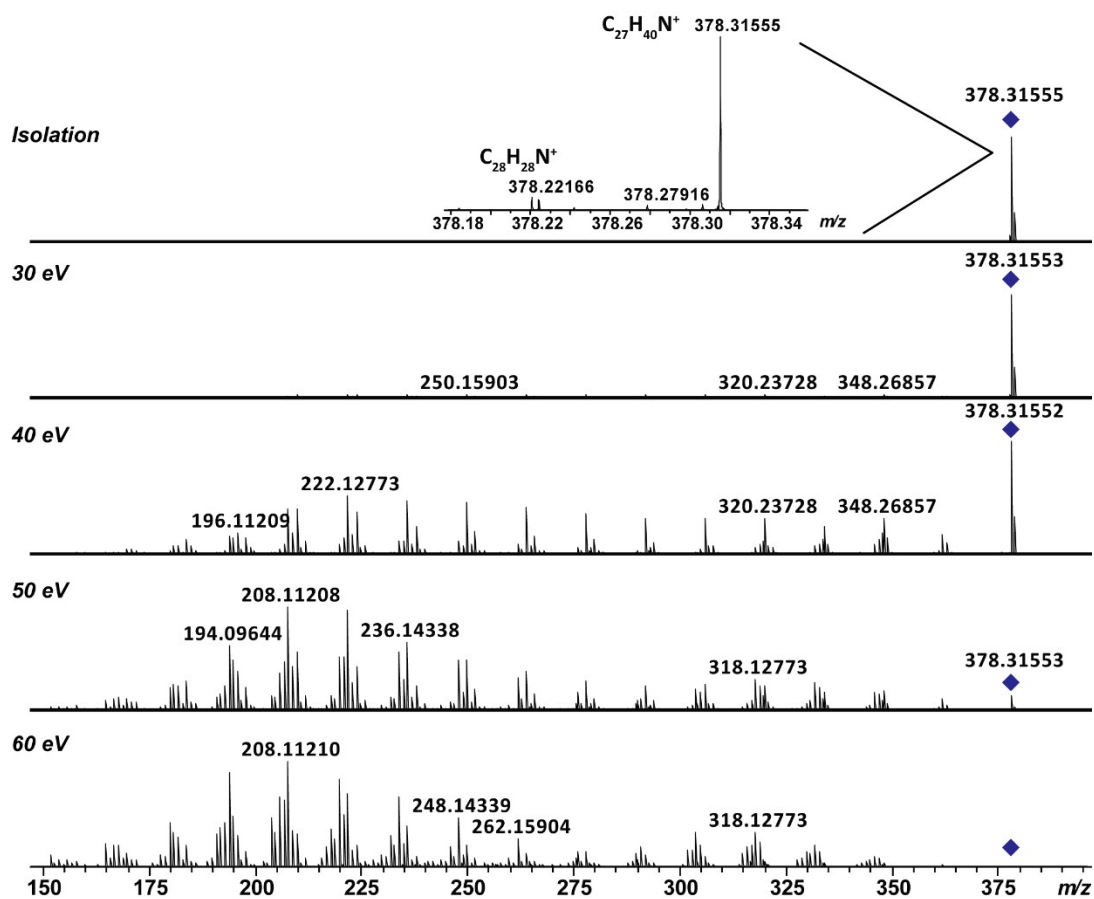

18

19 Figure S2. ESI/MS/MS spectra of the precursor ion at  $m/z$  378.31553 ( $C_{27}H_{40}N^+$ , DBE 9) and  $m/z$  378.22166 ( $C_{28}H_{28}N^+$ ,  
20 DBE 16) at collision energies 30 eV, 40 eV, 50 eV and 60 eV.

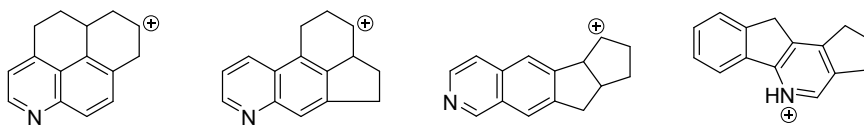

Chemical Formula:  $C_{15}H_{14}N^+$   
Exact Mass: 208.11208  
DBE 10

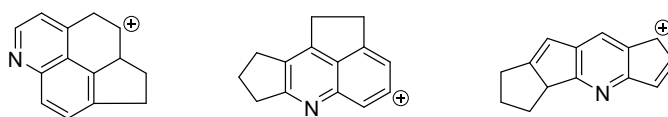

Chemical Formula:  $C_{14}H_{12}N^+$   
Exact Mass: 194.09643  
DBE 10

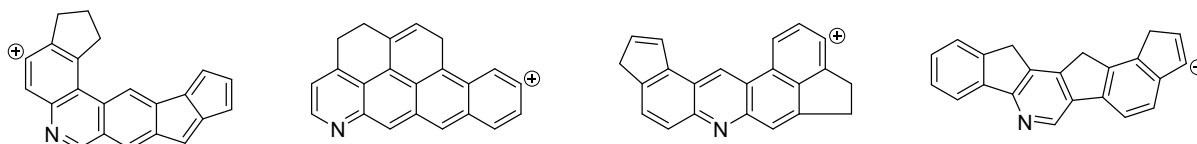

Chemical Formula:  $C_{22}H_{14}N^+$   
Exact Mass: 292.11208  
DBE 17

21

22

Figure S3. Hypothetical structures of the molecular nuclei of the most abundant fragment ions.

23

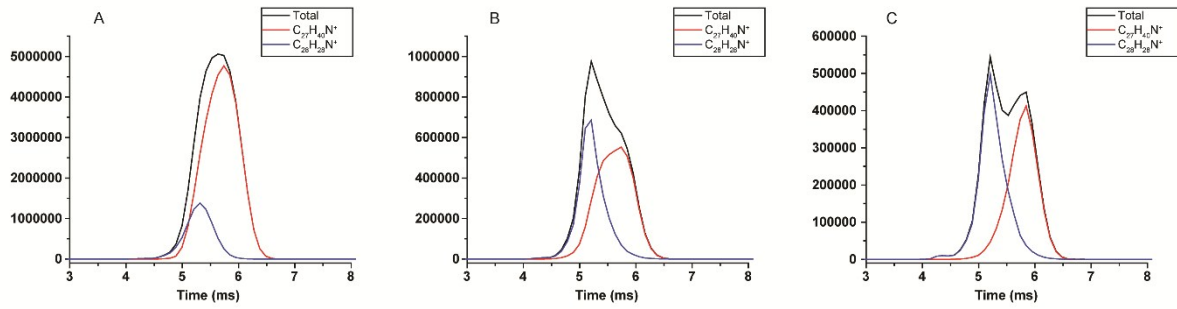

24

25 Figure S4. Superposition of the ion mobility spectra of the isobars of  $m/z$  378 for (A) VGO, (B) effluent mild HDN (70  
26 ppm) and (C) effluent deep HDN (10 ppm) process ( $m/z$  378.31553 ( $C_{27}H_{40}N^+$ , DBE 9) in blue and  $m/z$  378.22166  
27 ( $C_{28}H_{28}N^+$ , DBE 16) in red)

28

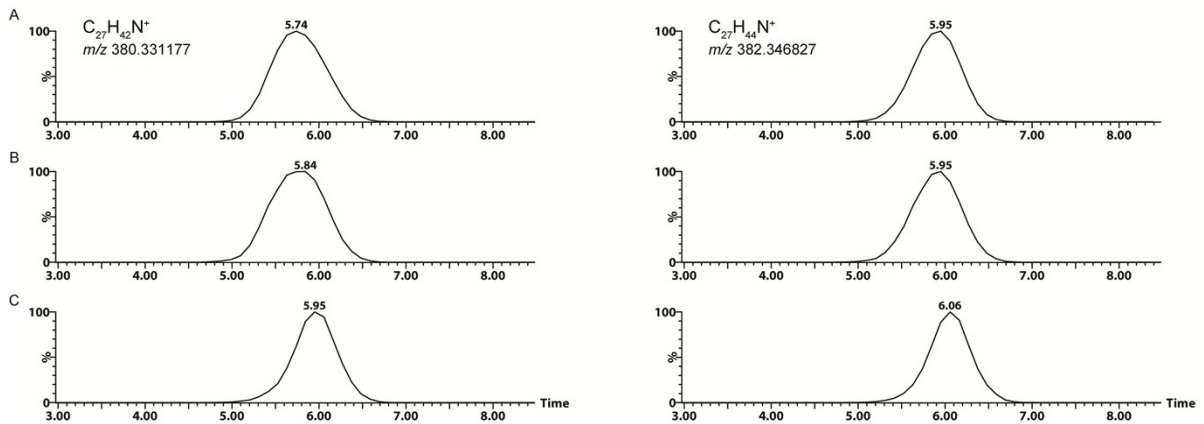

29

30 Figure S5. Ion mobility spectra of the  $m/z$  380.331177 ( $C_{27}H_{42}N^+$ , DBE 8) and  $m/z$  382.346827 ( $C_{27}H_{44}N^+$ , DBE 7)  
31 selected in the quadrupole for VGO (A), Effluent 70 ppm (B) and Effluent 10 ppm (C) process.

32

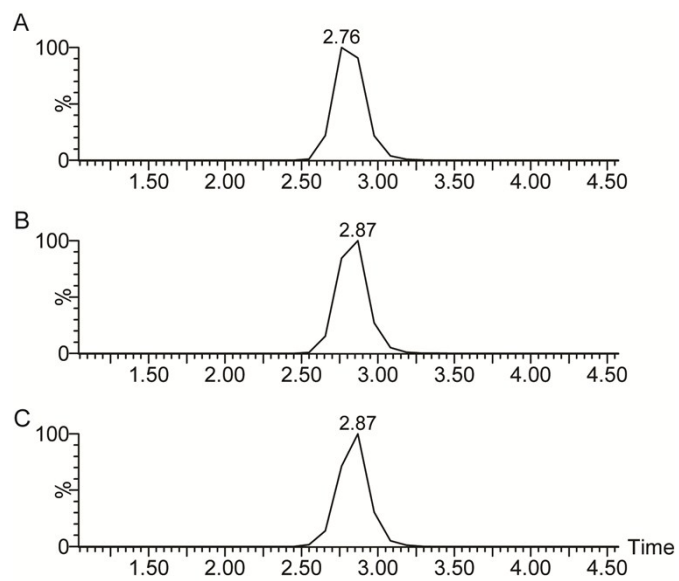

33

34

35

36

**Figure S6. Ion mobility spectra of  $C_{15}H_{14}N^+$   $m/z$  208.11208 (DBE 10) fragment ion from refractory precursor ions fragmented in the 70eV Trap for (A) VGO, (B) effluent mild HDN (70 ppm) and (C) effluent deep HDN (10 ppm) process.**
